# Supplementary material for: New Genes and Functional Innovation in Mammals
Source: PubMed Central journal article supplement — Genome Biol Evol. 2017 Jul 21;9(7):1886–900. doi: 10.1093/gbe/evx136 (PMC5554394; doi:10.1093/gbe/evx136), 2017-07-21
Supplement: evx136_SuppFig.pdf [file evx136_SuppFig.pdf]

Supplementary Figures. Villanueva-Cañas et al. New genes and functional innovation in mammals.

**Figure S1. Increase in family size with the use of RNA-Seq data.** Family size: number of species per gene family. **A** Original Data with no RNA-Seq data, only gene annotations. **B**. Data when RNA-Seq data was employed to assemble transcripts. In the latter case we performed additional sequence similarity searches against novel transcripts. These transcripts were obtained by *de novo* transcript assembly of reads from RNA sequencing samples (RNA-Seq). Transcript assemblies were obtained from 30 mammalian species. Only families containing two or more species are considered (2-30 species).

**A**

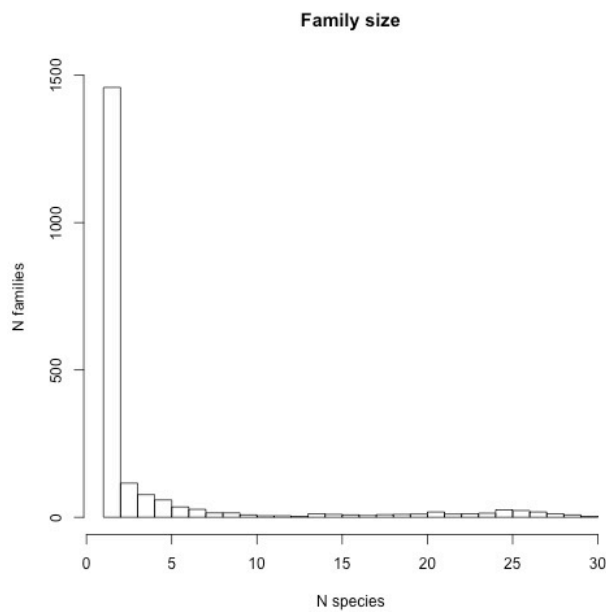

**B**

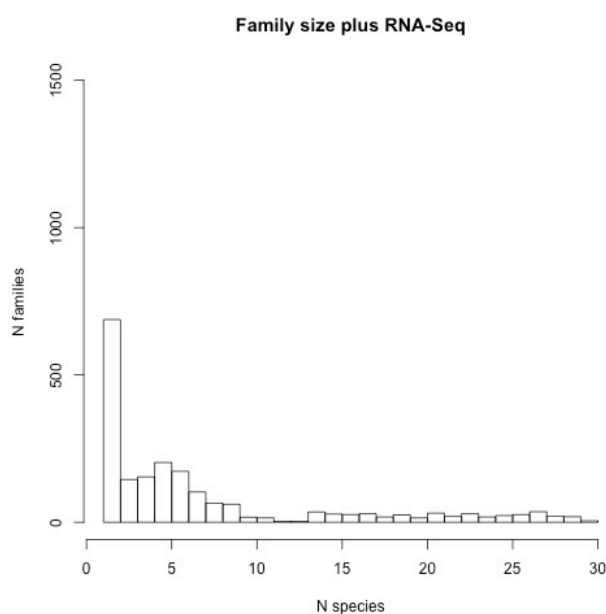

**Figure S2. Mammalian species tree including node numbers.** The tree depicts the phylogenetic relationships between 30 mammalian species from different major groups. The node number is indicated in each branch. We define three conservation levels: 'mam-basal' (class 2, approximately older than 100 Million years, red), 'mam-young' (class 1, green) and 'species-specific' (class 0, blue). The branch length represents the approximate number of substitutions per site as inferred from previous studies (see Methods). The scale bar on the bottom left corner represents 6 substitutions per 100 nucleotides. Dotted lines have been added to some branches to improve readability.

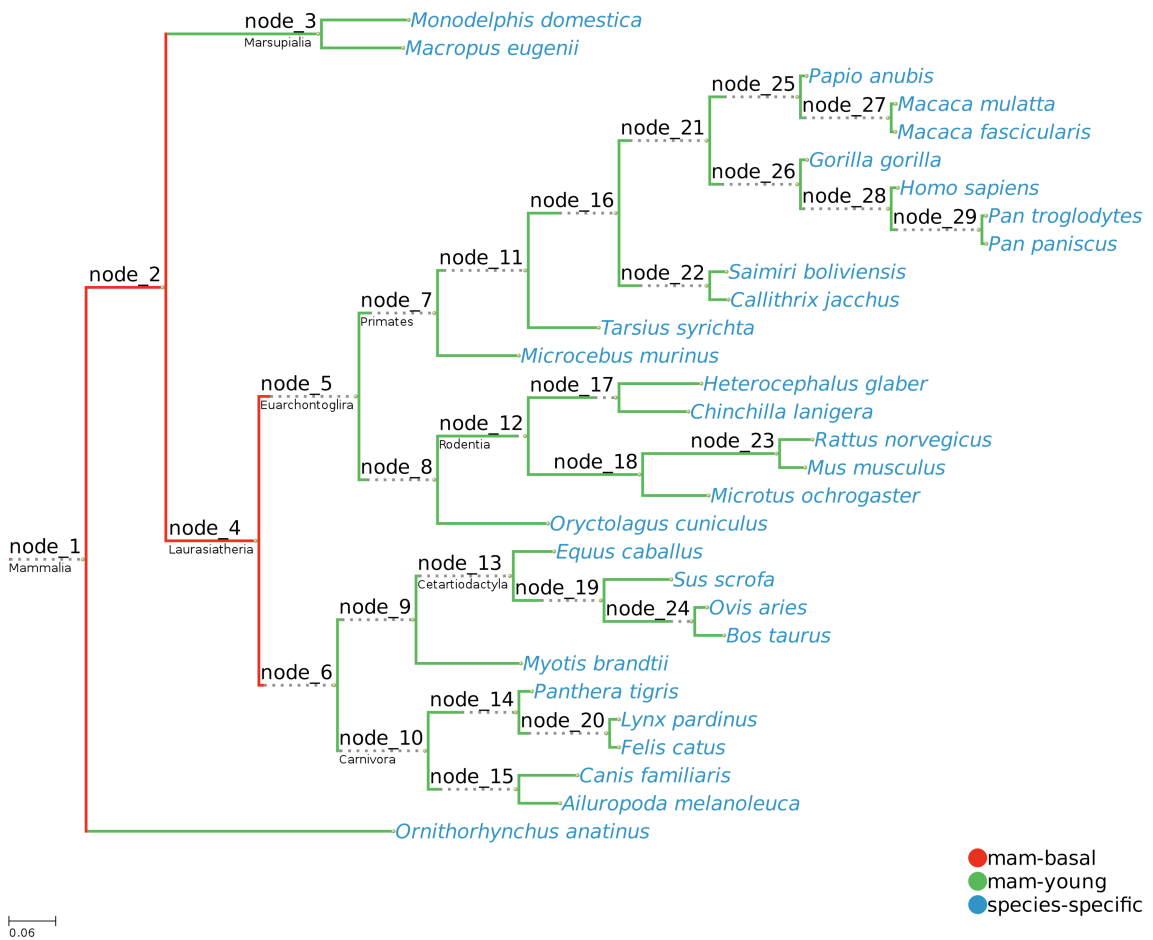

**Figure S3. Gene expression patterns of genes from different conservation levels for human genes.** Conservation levels A: ancestral; R: random; 2: 'mam-basal'; 1: 'mam-young'; 0: species-specific. **A.** Proportion of broadly-expressed and tissue-specific genes in different conservation classes. **B.** Number of genes with maximum expression in a given tissue for different conservation classes. **C.** Box-plot showing the distribution of FPKM gene expression values, at a logarithmic scale, in different conservation classes. Data in B and C is for tissue-specific genes.

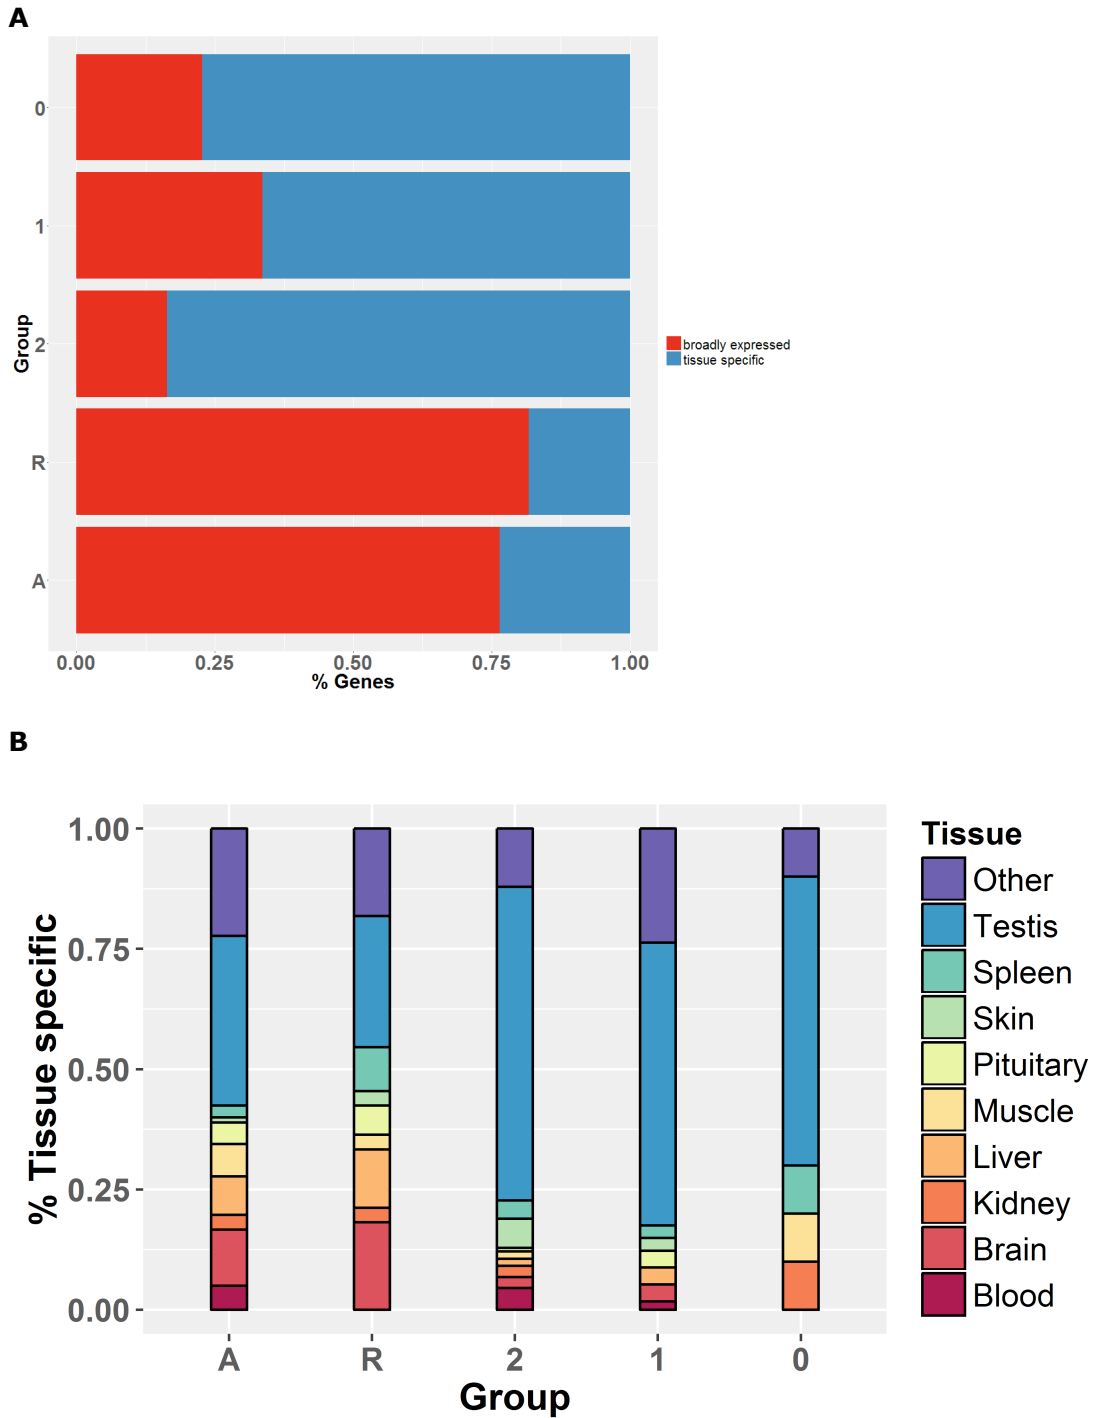

**C**

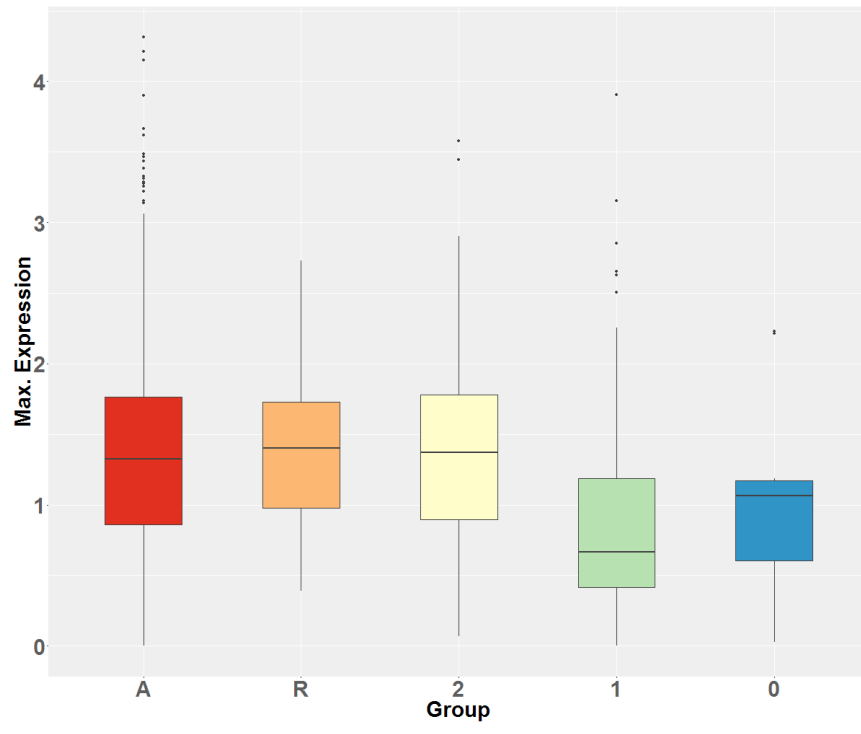

**Figure S4. Sequence length in relation to protein conservation level.** Distribution of protein sizes (in amino acids) in different groups, shown as violin plots. **A.** Data for human. **B.** Data for mouse. Conservation levels A: ancestral, conserved in 34 non-mammalian species from diverse eukaryotic groups; R: random, non-mammalian-specific random gene dataset; 2: 'mam-basal'; 1: 'mam-young'; 0: species-specific. Mammalian-specific genes (0,1,2) were in general shorter than non-mammalian-specific genes (A,R), in both human and mouse (Wilcoxon test,  $p$ -value  $< 10^{-5}$ ). We also observed that proteins from level 2 tended to be longer than those from level 1, in both human and mouse (Wilcoxon test,  $p$ -value  $< 0.01$ ).

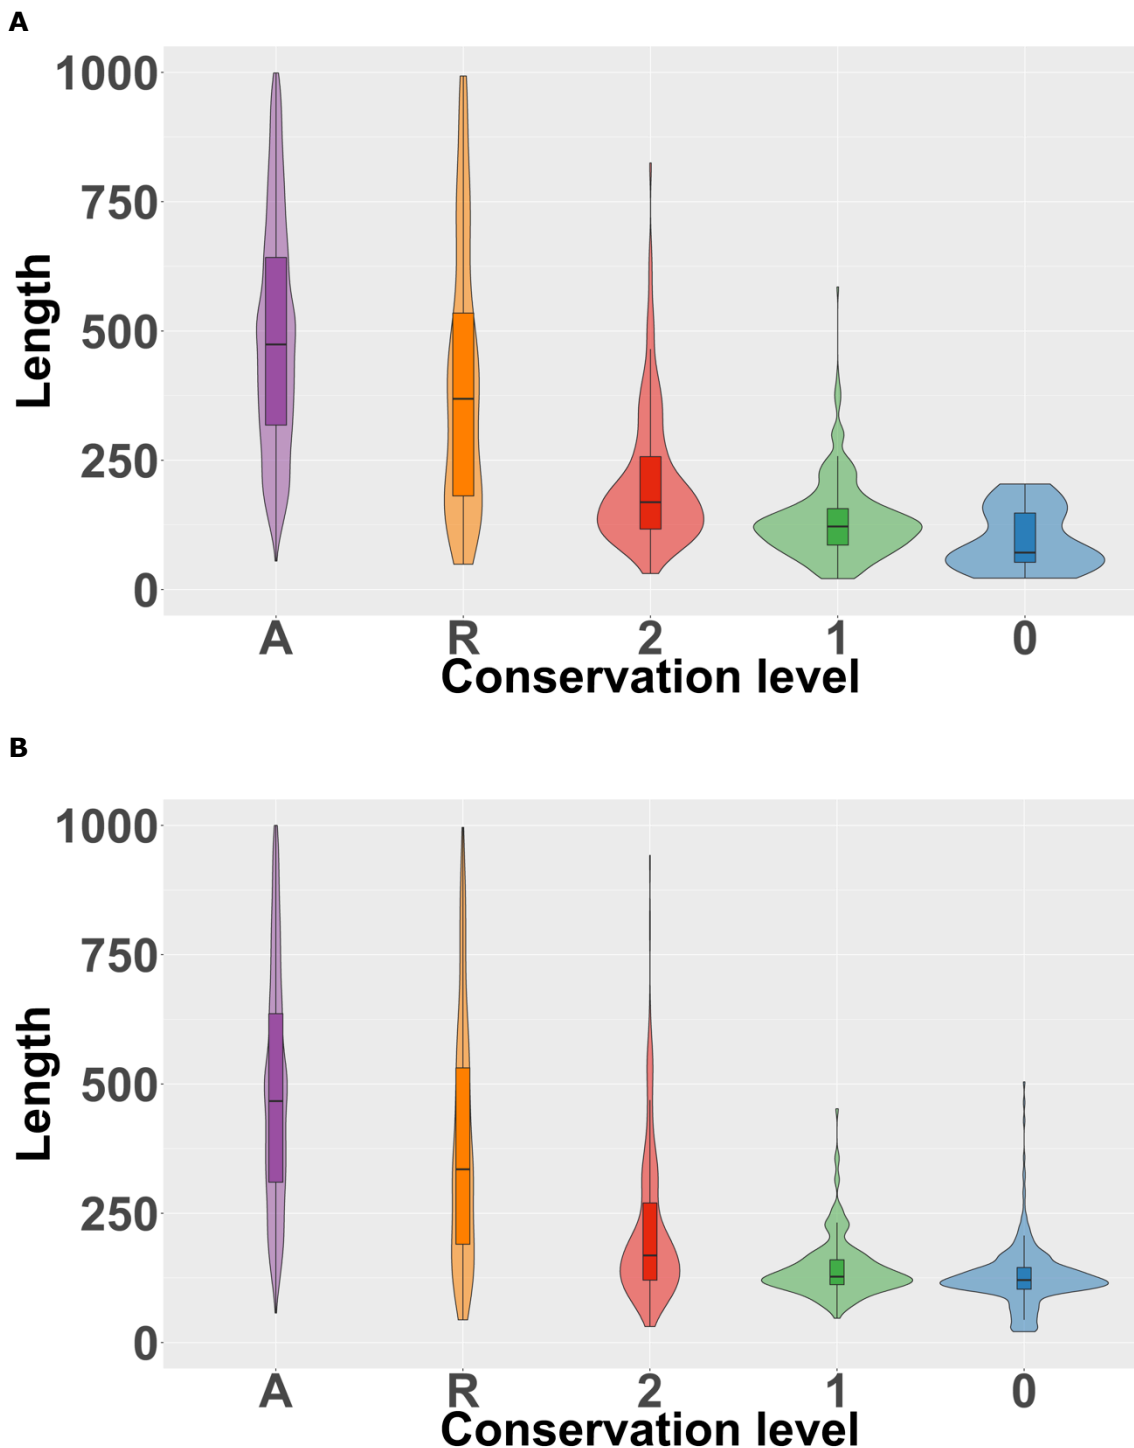

**Figure S5. Aromaticity in relation to protein conservation level.** Distribution of the values in each groups is shown as violin plots. **A.** Data four human. **B.** Data for mouse. Conservation levels A: ancestral, conserved in 34 non-mammalian species from diverse eukaryotic groups; R: random, non-mammalian-specific random gene dataset; 2: 'mam-basal'; 1: 'mam-young'; 0: species-specific.

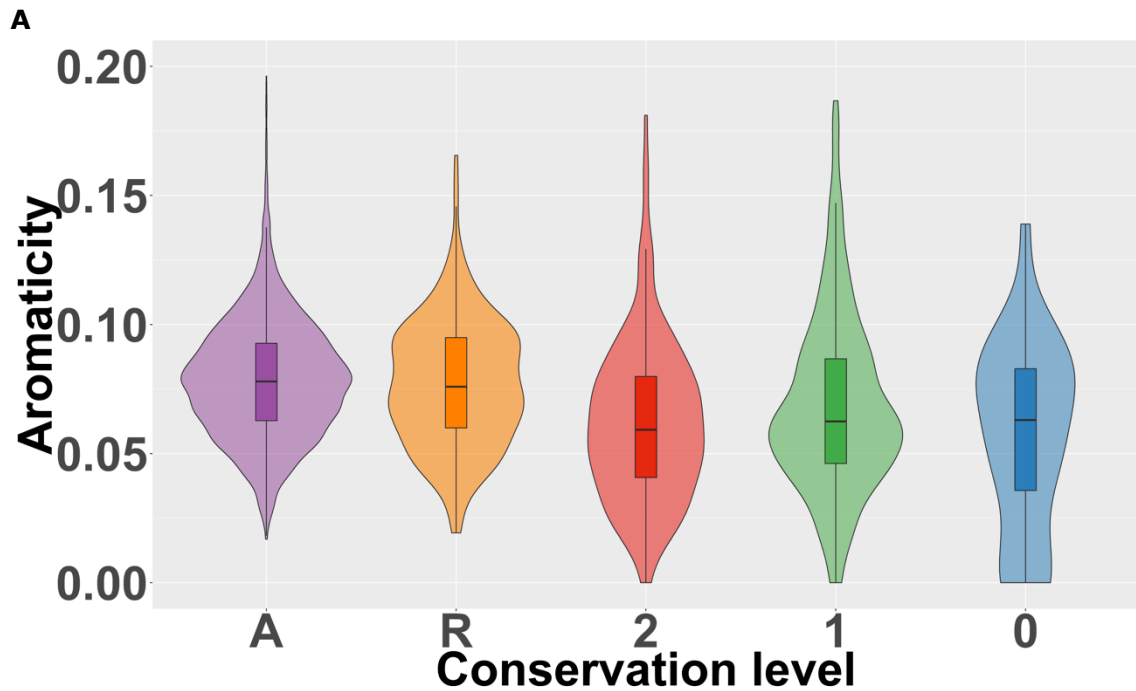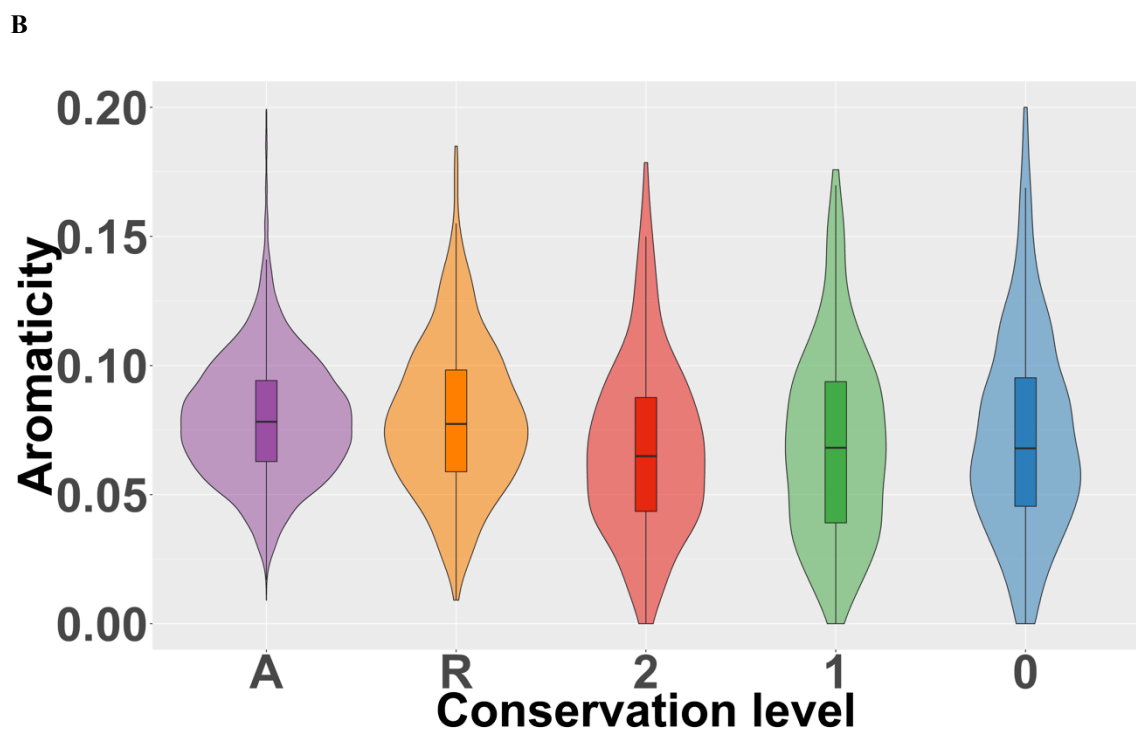

**Figure S6. Isoelectric point (IP) in relation to protein conservation level.** Distribution of values in each group is shown as violin plots. **A.** Data four human. **B.** Data for mouse. Conservation levels A: ancestral, conserved in 34 non-mammalian species from diverse eukaryotic groups; R: random, non-mammalian-specific random gene dataset; 2: 'mam-basal'; 1: 'mam-young'; 0: species-specific.

**A**

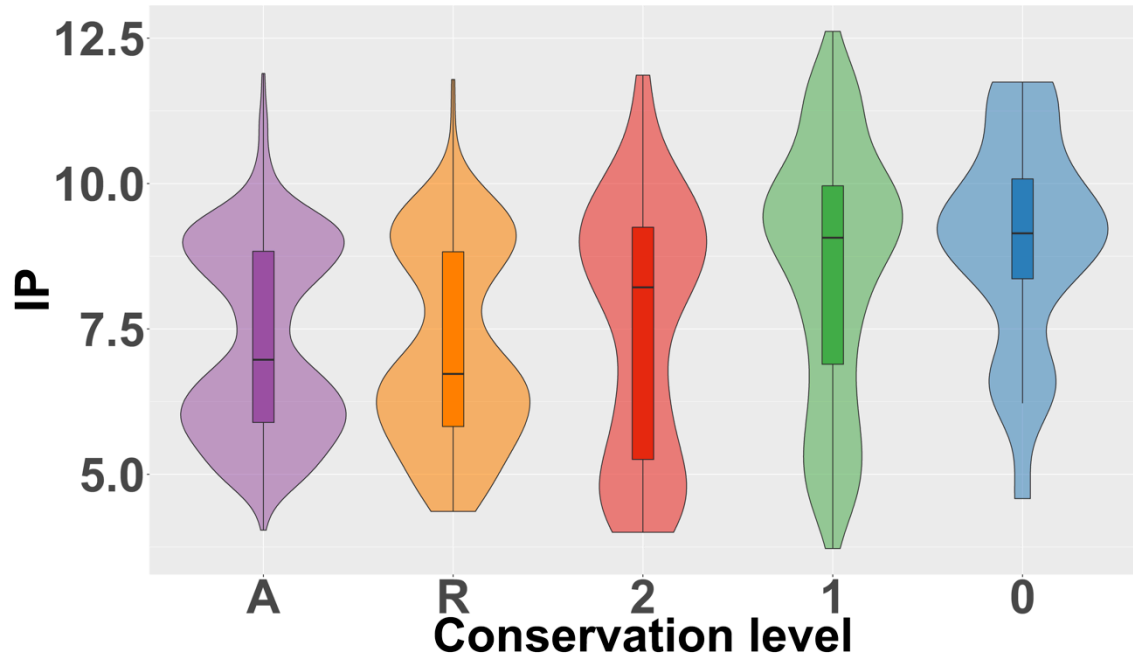

**B**

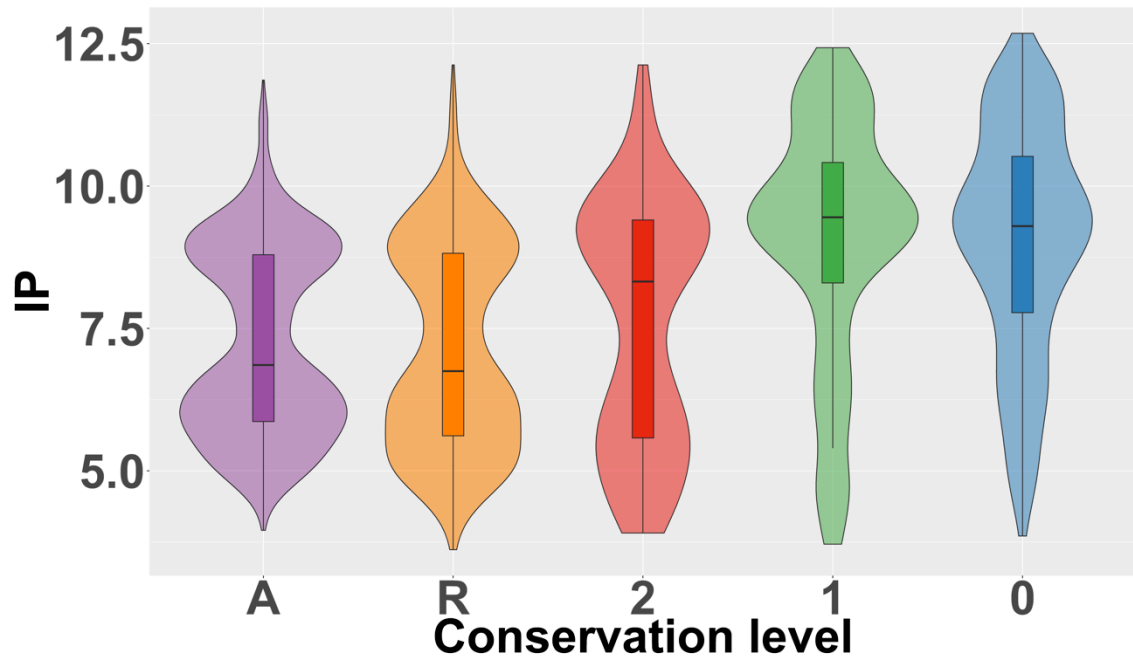

**Figure S7. Discovery of a new sequence with antimicrobial activity in MUCIN-7. A.** Sequence of MUCIN-7 main isoform (Uniprot ID Q8TAX7). The sequence stretch with antimicrobial activity predicted by AMPA and subsequently validated experimentally is indicated in red. **B.** Minimal inhibitory concentration (MIC,  $\mu\text{g}/\text{mL}$ ) of the antimicrobial stretch against several Gram+ and Gram- bacteria. Under no effect values higher than 128 are expected.

**A**

>sp|Q8TAX7|MUC7\_HUMAN Mucin-7 OS=Homo sapiens GN=MUC7 PE=1  
 SV=2MKTLPLFVCICALSACFSFSEGRERDHELRRHRRHHHQSPKSHFELPHYPGLLAHQKPFIR  
 KSYKCLHKRCRPKLPPSPNNPPKFPNPHQPPKHPDKNSSVNVNPTLVATTQIPSVTFPSASTKIT  
 TLPNVTFLLPQNATTISSRENVNTSSSVATLAPVNSPAPQDTTAAPPTPSATTPAPPSSSAPPETT  
 AAPPTPSATTQAPPSSSAPPETTAAPPTPPATTPAPPSSSAPPETTAAPPTPSATTPAPLSSSA  
 PPETTAVPPTPSATLDPSSASAPPETTAAPPTPSATTPAPPSSPAPQETTAAPITTPNSSPTTL  
 APDTSETSAAPTHQTTTSTTTQTTTTKQPTSAPGQNKISRFLLYMKNLLNRIIDDMVEQ

**B**

|                                 | Gram -                       |                                    | Gram +                           |                                |
|---------------------------------|------------------------------|------------------------------------|----------------------------------|--------------------------------|
|                                 | <i>E. coli</i><br>ATCC 25922 | <i>P. aeruginosa</i><br>ATCC 27853 | <i>E. faecalis</i><br>ATCC 29212 | <i>S. aureus</i><br>ATCC 29213 |
| MIC ( $\mu\text{g}/\text{mL}$ ) | 64                           | 128                                | 16                               | 16                             |
